# Supplementary material
Source: PubMed Central journal article supplement (PMC5935520)
Supplement: NIHMS938915-supplement-Suppl_Tables.pdf [file NIHMS938915-supplement-Suppl_Tables.pdf]

| Primer Name     | Sequence                  | Application |
|-----------------|---------------------------|-------------|
| ANXA1_RT_F      | AAGCAGGAGAAAGGAGAAAGG     | RT          |
| ANXA1_RT_R      | AACTCCAGGTCCAGAACTTTG     | RT          |
| APOE_RT_F       | TTGCTGGTCACATTCTGG        | RT          |
| APOE_RT_R       | AGGTAATCCAAAAGCGACC       | RT          |
| CDKN1c_RT_F     | CTGACCAGCTGCACTCG         | RT          |
| CDKN1c_RT_R     | CTCAGGGCGTGATCTCTTG       | RT          |
| SPON2_RT_F      | ATGAGATTGTAGACAGCGCC      | RT          |
| SPON2_RT_R      | GTCCTGCTCTTGGTCCC         | RT          |
| Syncytin-1_RT_F | ATGGAGCCCAAGATGCAG        | RT          |
| Syncytin-1_RT_R | AGATCGTGGGCTAGCAG         | RT          |
| Syncytin-2_RT_F | TTGGGTAAATCAATCAGGAAAAGT  | RT          |
| Syncytin-2_RT_R | GTAAACTGGAGGCTTGATTTAGGA  | RT          |
| Syncytin-3_RT_F | TTAGCCACAAATTCTGGGATAACT  | RT          |
| Syncytin-3_RT_R | AGAGGTAACAATAGAGGCCATGAG  | RT          |
| erv-3_RT_F      | AACTAATGCCCAAGATAAATTTCA  | RT          |
| erv-3_RT_R      | TTAAGAACCAGATGCTCTGACTTG  | RT          |
| envW2_RT_F      | GCTACAAATGGTTCTTCAAATGGAG | RT          |
| envW2_RT_R      | ACAAGGGCTAGCAGGCT         | RT          |
| erv_9_1_RT_F    | TCTTGGAGTCCTCACTCAAATC    | RT          |
| erv_9_1_RT_R    | ACTGCTGCAACTACCTTAAACA    | RT          |
| ERF-FXA34_RT_F  | CAGGAAACTAACTTTCAGCGAGA   | RT          |
| ERF-FXA34_RT_R  | TAAAGAGGGCATGGAGTAATTGA   | RT          |
| EnvE_RT_F       | ACTGGCCTTTTCCTAGGTGATAC   | RT          |
| EnvE_RT_R       | TACTATTAATGGCTGCACAAGCA   | RT          |
| SEC23A_ChIP_F   | TGGTGCCTTCTTTGTTCTC       | ChIP        |
| SEC23A_ChIP_R   | GCCTCTCATGAATGGGATTAG     | ChIP        |
| INTS2_ChIP_F    | CAAGGCTGAATCCTCATCTAC     | ChIP        |
| INTS2_ChIP_R    | GGGTATGAAAGAAAGCACTTAAC   | ChIP        |
| FBXO33_ChIP_F   | CCTGTATGTTATCCACCCATC     | ChIP        |
| FBXO33_ChIP_R   | TGCCTTTGACCCAAGTAAG       | ChIP        |

Supp. Table 1

| Cell Line      | Tissue | Primary Diagnosis     | Molecule | IC25 (µM) | IC50 (µM) |
|----------------|--------|-----------------------|----------|-----------|-----------|
| MCF_10A        | Breast | Fibrocystic Disease   | CPI-455  | 0.86      | 8.58      |
| EFM_192C       | Breast | Adenocarcinoma        | CPI-455  | 3.20      | 9.32      |
| HCC1187        | Breast | Adenocarcinoma Ductal | CPI-455  | 2.16      | 10.90     |
| KPL_3          | Breast | Adenocarcinoma Ductal | CPI-455  | 6.81      | 13.39     |
| EFM_19         | Breast | Carcinoma             | CPI-455  | 4.40      | 14.66     |
| MDA_MB_330     | Breast | Carcinoma             | CPI-455  | 8.66      | 17.43     |
| MDA_MB_453     | Breast | Carcinoma             | CPI-455  | 10.54     | 18.44     |
| AU565          | Breast | Adenocarcinoma        | CPI-455  | 12.28     | 18.72     |
| MDA_MB_468     | Breast | Adenocarcinoma        | CPI-455  | 10.75     | 19.05     |
| HCC1500        | Breast | Adenocarcinoma Ductal | CPI-455  | 17.26     | 19.36     |
| SK_BR_3        | Breast | Adenocarcinoma        | CPI-455  | 16.72     | 19.39     |
| HCC1954        | Breast | Adenocarcinoma Ductal | CPI-455  | 16.84     | 21.75     |
| MD_MB_361      | Breast | Adenocarcinoma        | CPI-455  | 18.09     | 22.00     |
| BT_483         | Breast | Adenocarcinoma Ductal | CPI-455  | 17.67     | 22.14     |
| MDA_MB_157     | Breast | Carcinoma Medullary   | CPI-455  | 17.77     | 22.51     |
| MCF_7          | Breast | Adenocarcinoma        | CPI-455  | 13.16     | 22.59     |
| HCC1937        | Breast | Adenocarcinoma Ductal | CPI-455  | 18.25     | 24.68     |
| HCC1419        | Breast | Adenocarcinoma Ductal | CPI-455  | 18.91     | 24.72     |
| CAL_120        | Breast | Adenocarcinoma        | CPI-455  | 17.58     | 24.94     |
| HCC70          | Breast | Adenocarcinoma Ductal | CPI-455  | 18.31     | 24.97     |
| BT_20          | Breast | Carcinoma             | CPI-455  | 18.26     | 25.21     |
| MDA_MB_436     | Breast | Adenocarcinoma        | CPI-455  | 17.73     | 25.25     |
| T_47D          | Breast | Adenocarcinoma Ductal | CPI-455  | 19.51     | 25.88     |
| ZR_75_30       | Breast | Adenocarcinoma Ductal | CPI-455  | 17.98     | 28.81     |
| Hs 578T        | Breast | Carcinoma             | CPI-455  | 18.17     | 29.11     |
| HCC1428        | Breast | Adenocarcinoma        | CPI-455  | 13.59     | 29.41     |
| MDA_MB_415     | Breast | Adenocarcinoma        | CPI-455  | 16.92     | 31.71     |
| UACC_812       | Breast | Adenocarcinoma Ductal | CPI-455  | 19.67     | 36.20     |
| CAL51          | Breast | Adenocarcinoma        | CPI-455  | 19.54     | 36.33     |
| MDA-MB-175-VII | Breast | Adenocarcinoma Ductal | CPI-455  | 13.22     | 39.74     |
| CAMA-1         | Breast | Adenocarcinoma        | CPI-455  | 7.71      | >50       |
| MDA_MB_231     | Breast | Adenocarcinoma        | CPI-455  | 24.60     | >50       |
| CAL_148        | Breast | Adenocarcinoma        | CPI-455  | 26.78     | >50       |
| HBL_100        | Breast | Normal                | CPI-455  | 27.84     | >50       |
| BT_549         | Breast | Adenocarcinoma Ductal | CPI-455  | 30.43     | >50       |
| BT_474         | Breast | Adenocarcinoma Ductal | CPI-455  | 39.05     | >50       |
| JIMT-1         | Breast | Adenocarcinoma Ductal | CPI-455  | >50       | >50       |

Supp. Table 2
