# Supplementary material
Source: PubMed Central journal article supplement (PMC5935520)

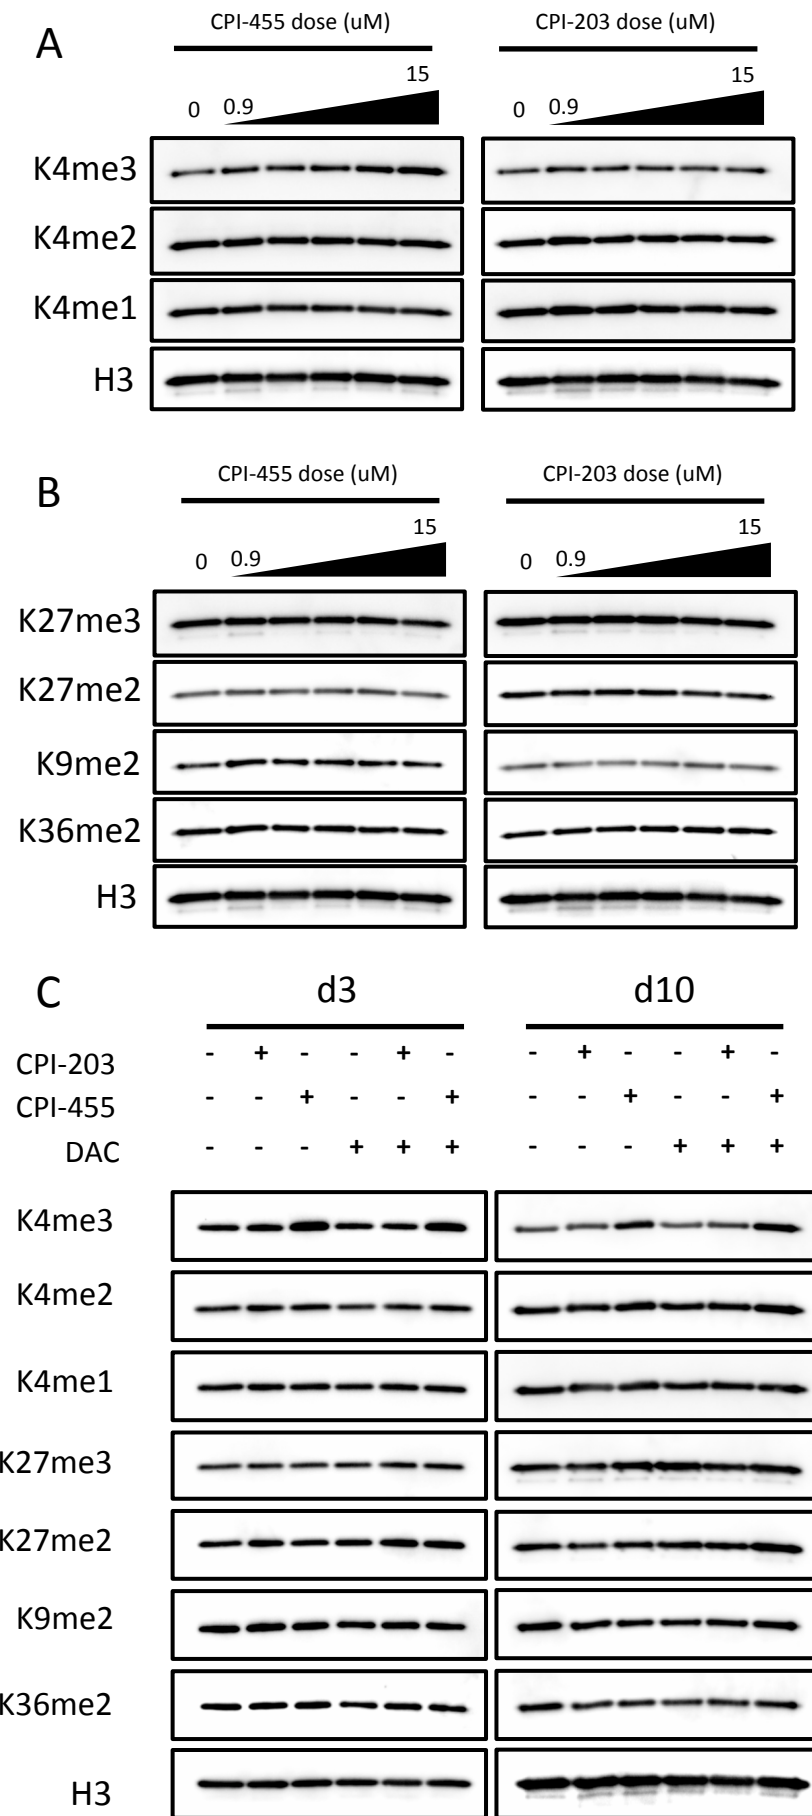

Supp. Fig 1

Supplement: NIHMS938915-supplement-Suppl_FigS1.pdf [file NIHMS938915-supplement-Suppl_FigS1.pdf]

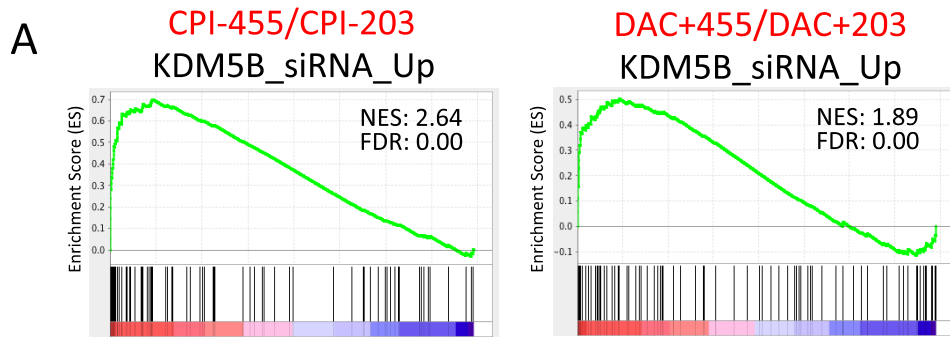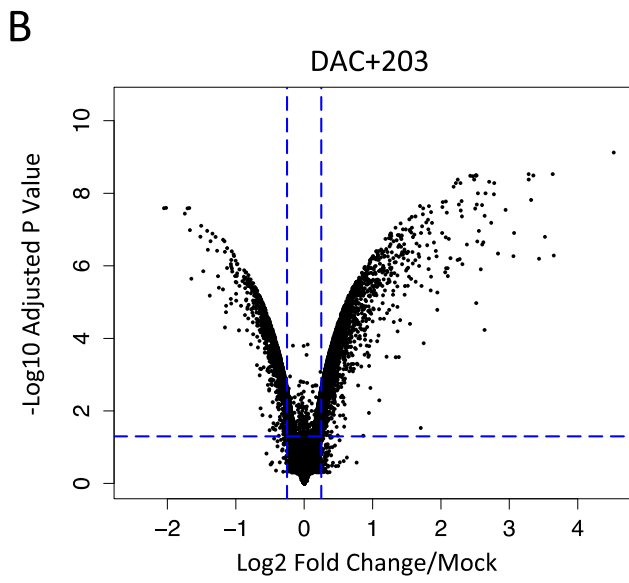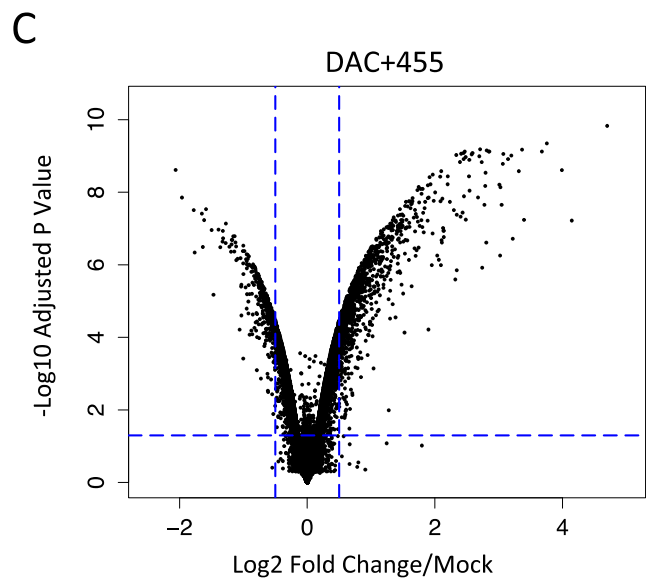

**D**

|         | Log2 Fold Change/Mock |     |     |
|---------|-----------------------|-----|-----|
|         | 0.5                   | 1   | 1.5 |
| DAC     | 807                   | 230 | 95  |
| DAC+203 | 902                   | 261 | 113 |
| DAC+455 | 1088                  | 315 | 126 |

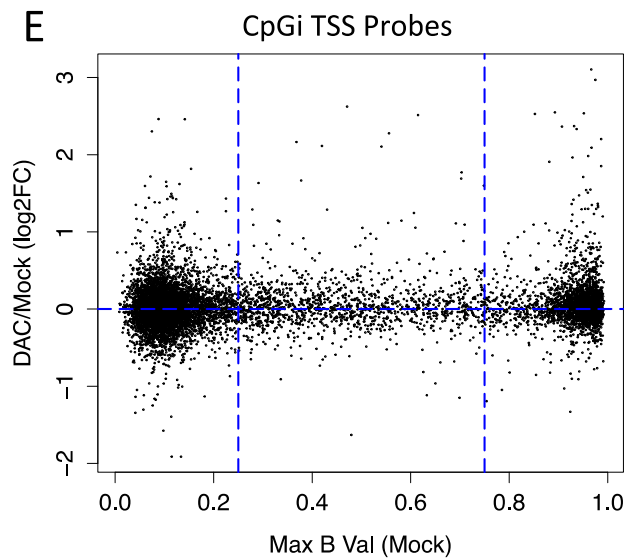

Supp. Fig 2

Supplement: NIHMS938915-supplement-Suppl_FigS2.pdf [file NIHMS938915-supplement-Suppl_FigS2.pdf]

**A**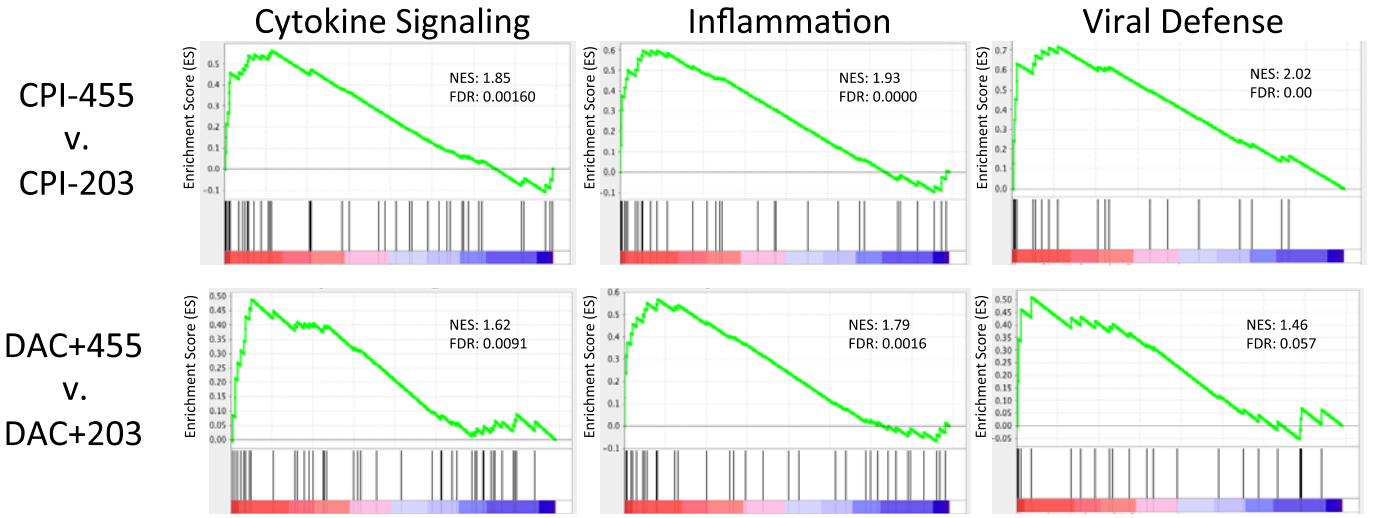**B**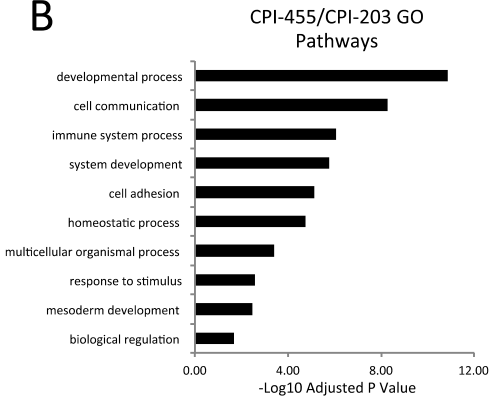**C**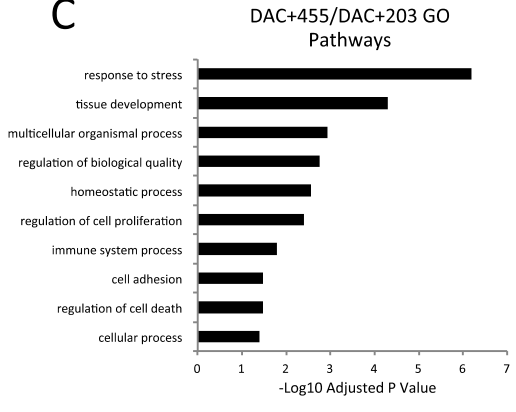**D**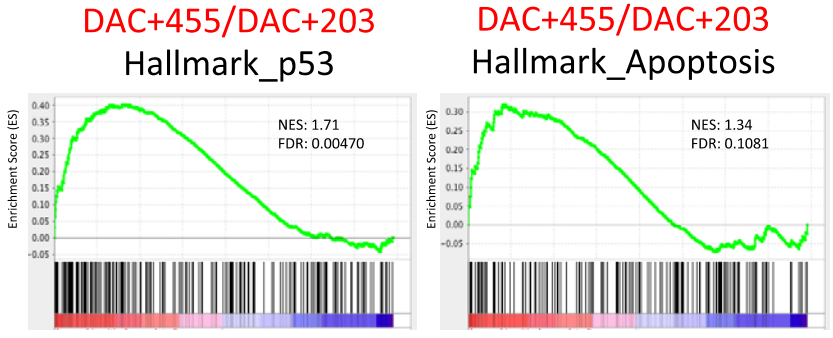

Supplement: NIHMS938915-supplement-Suppl_FigS3.pdf [file NIHMS938915-supplement-Suppl_FigS3.pdf]

**A**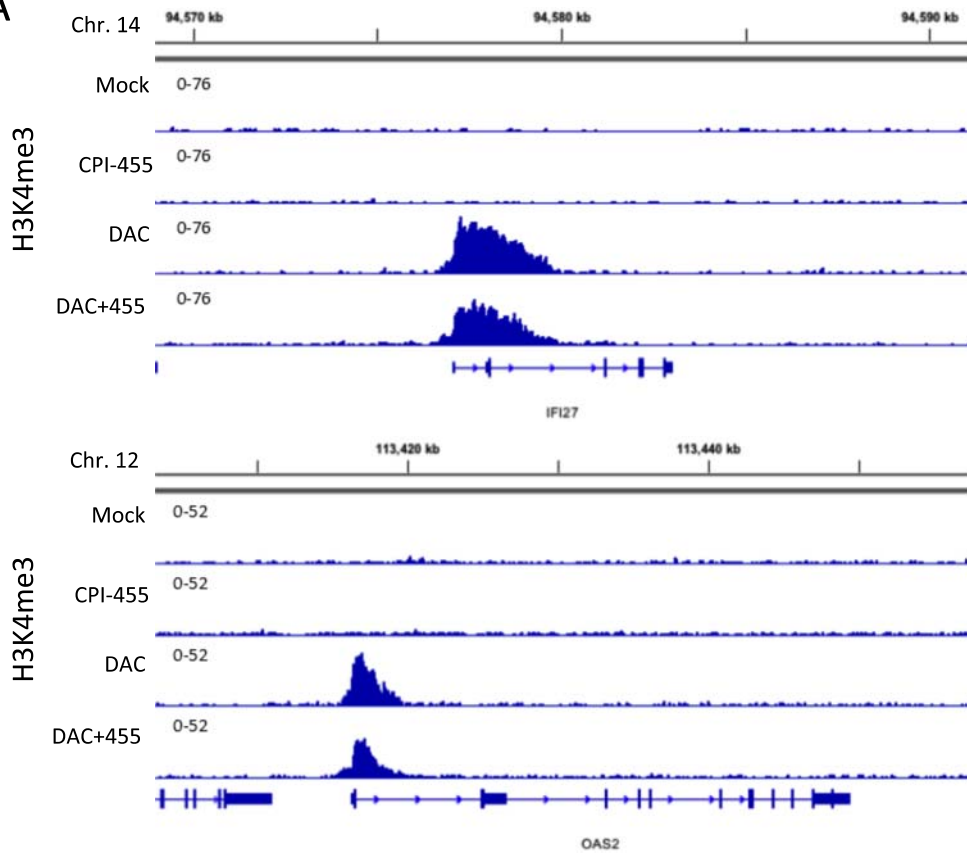**B**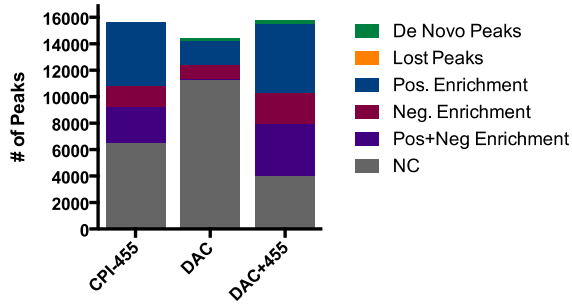**C**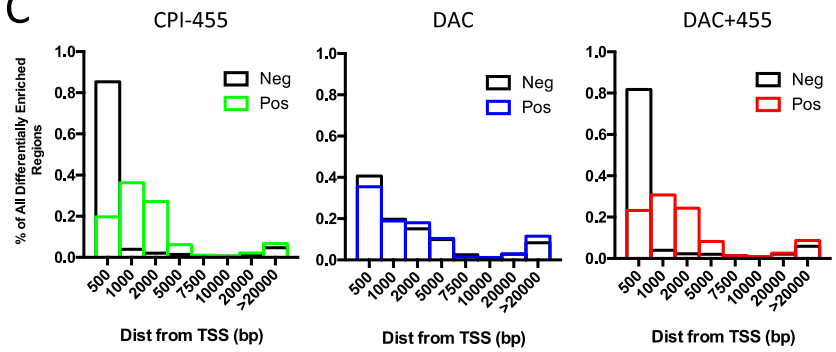**D**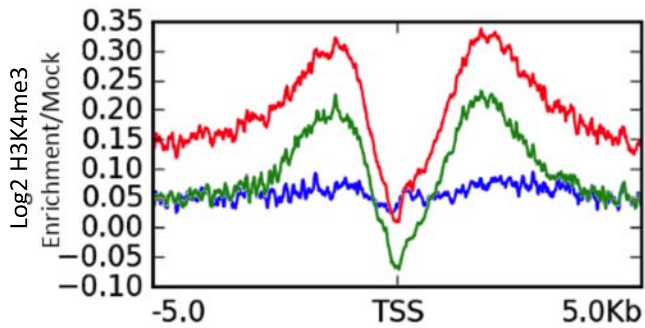**E**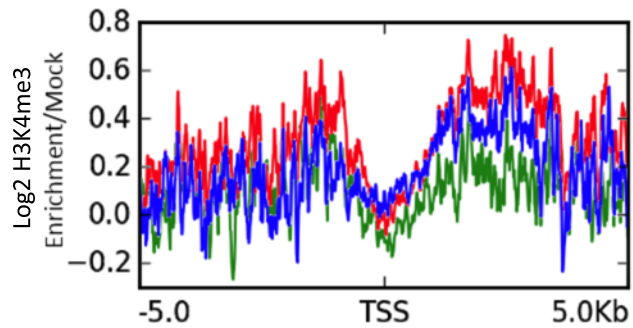

CPI-455 DAC DAC+455

Supplement: NIHMS938915-supplement-Suppl_FigS4.pdf [file NIHMS938915-supplement-Suppl_FigS4.pdf]

**A**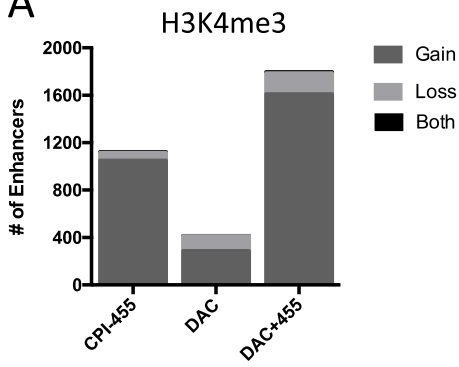**B**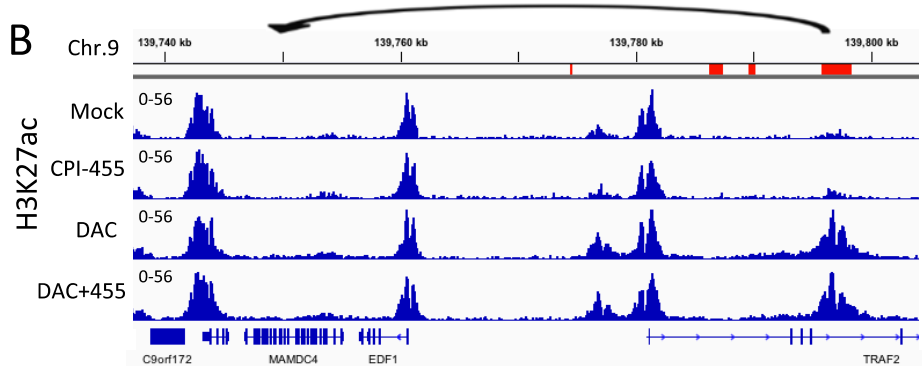**D**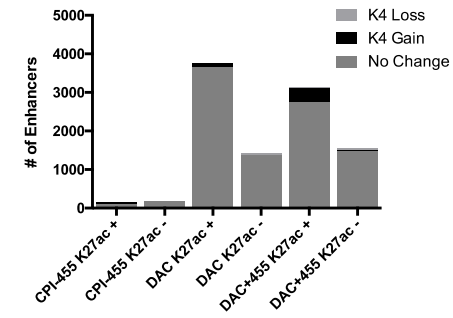**C**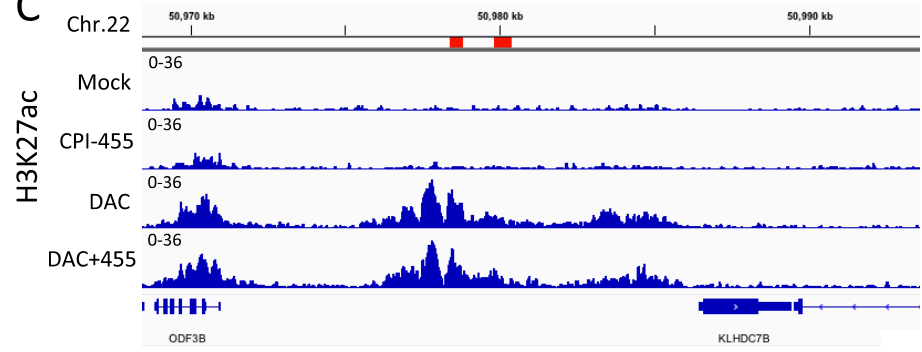**E**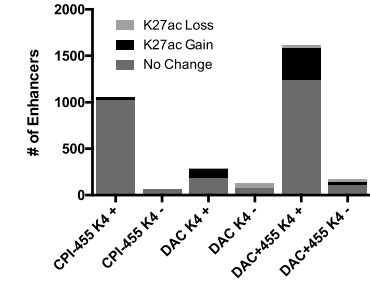**F**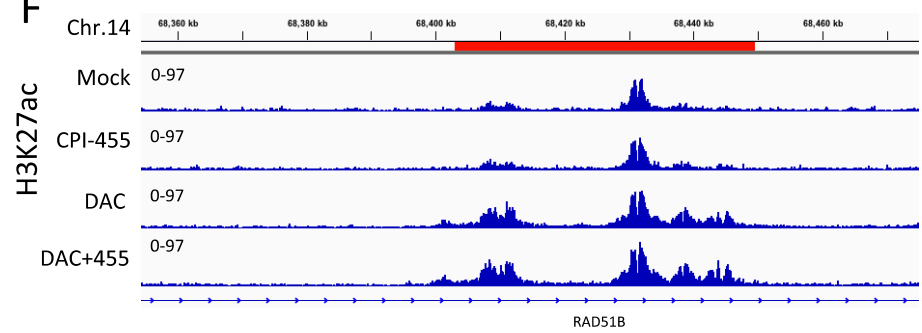**G**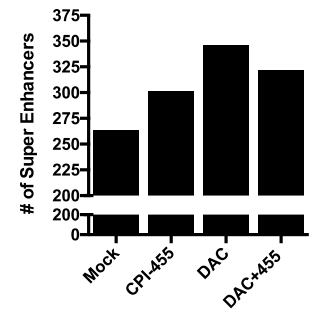**H**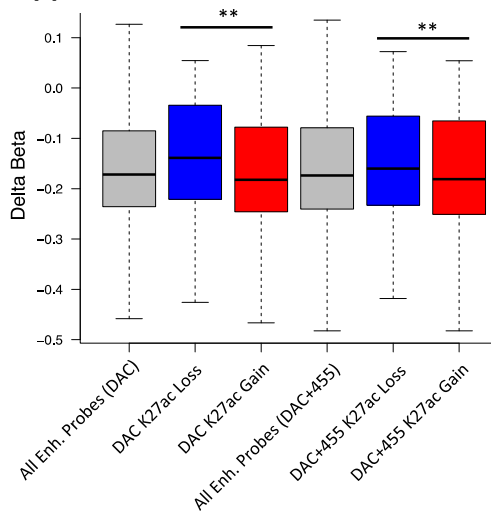**I**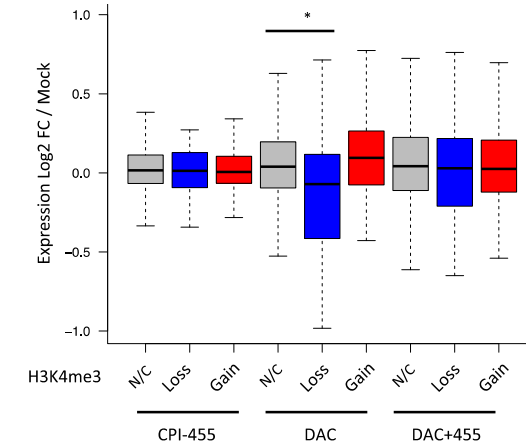

Supplement: NIHMS938915-supplement-Suppl_FigS5.pdf [file NIHMS938915-supplement-Suppl_FigS5.pdf]

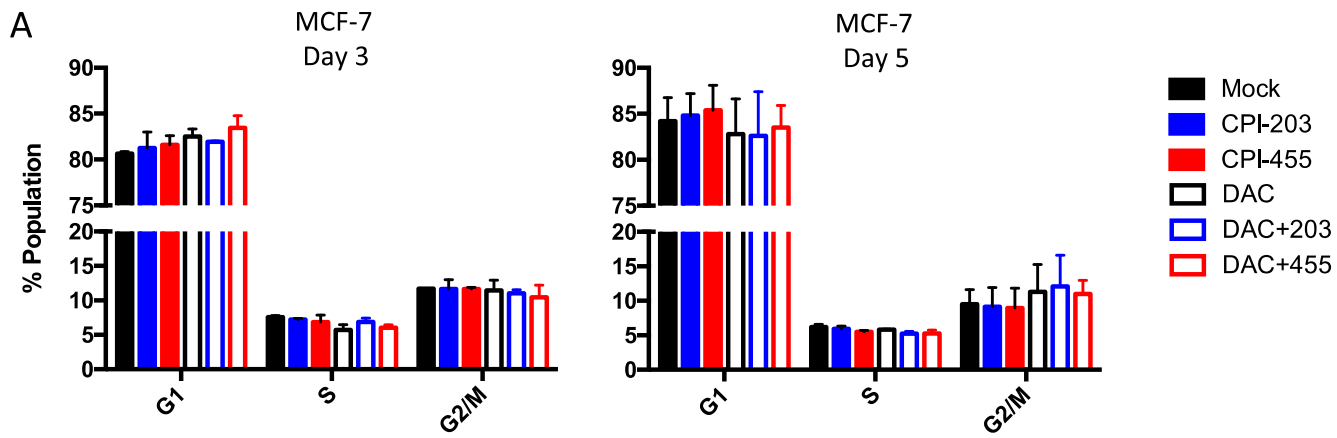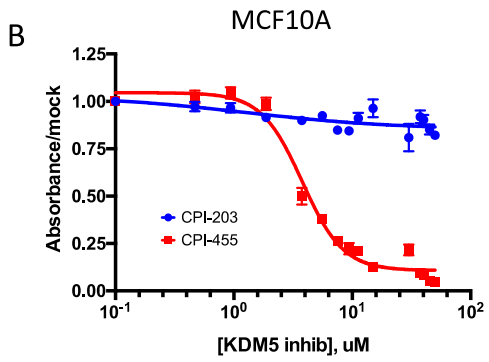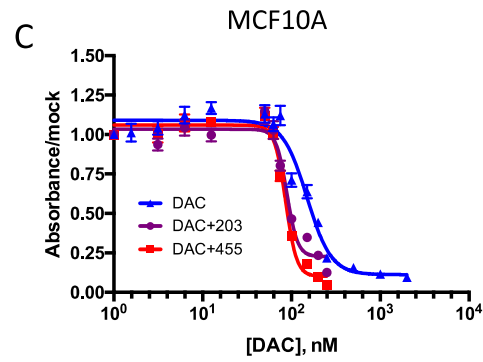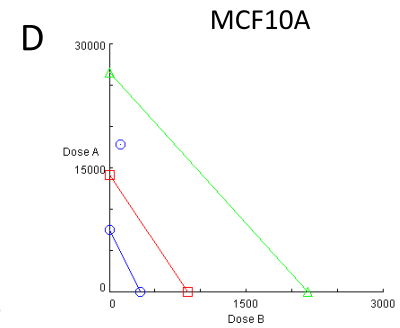

Supp. Fig 6

Supplement: NIHMS938915-supplement-Suppl_FigS6.pdf [file NIHMS938915-supplement-Suppl_FigS6.pdf]
